# Supplementary material for: EZH2-mediated loss of miR-622 determines CXCR4 activation in hepatocellular carcinoma
Source: PubMed Central journal article supplement (PMC4598861; doi:10.1038/ncomms9494), 2015-09-25
Supplement: ncomms9494-s1.pdf [file ncomms9494-s1.pdf]

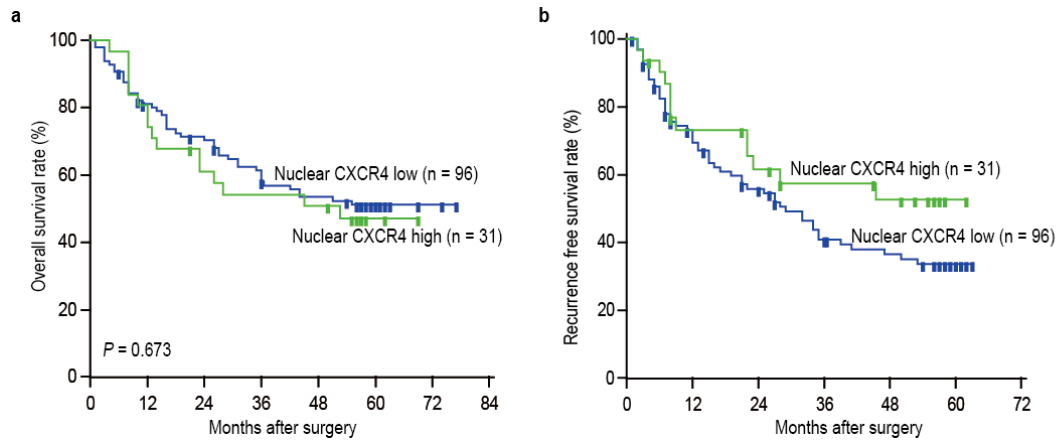

**Supplementary Figure 1: Nuclear CXCR4 is not correlated with clinical outcome of HCC patients** Kaplan-Meier plots indicate the overall survival (a) and recurrence free survival (b) for HCC patients categorized by nuclear CXCR4 expression (n = 31 for high nuclear CXCR4 group versus n = 96 low CXCR4 group),  $P$  value is determined by log-rank test. CXCR4 high, IHC score  $\geq 110$ .

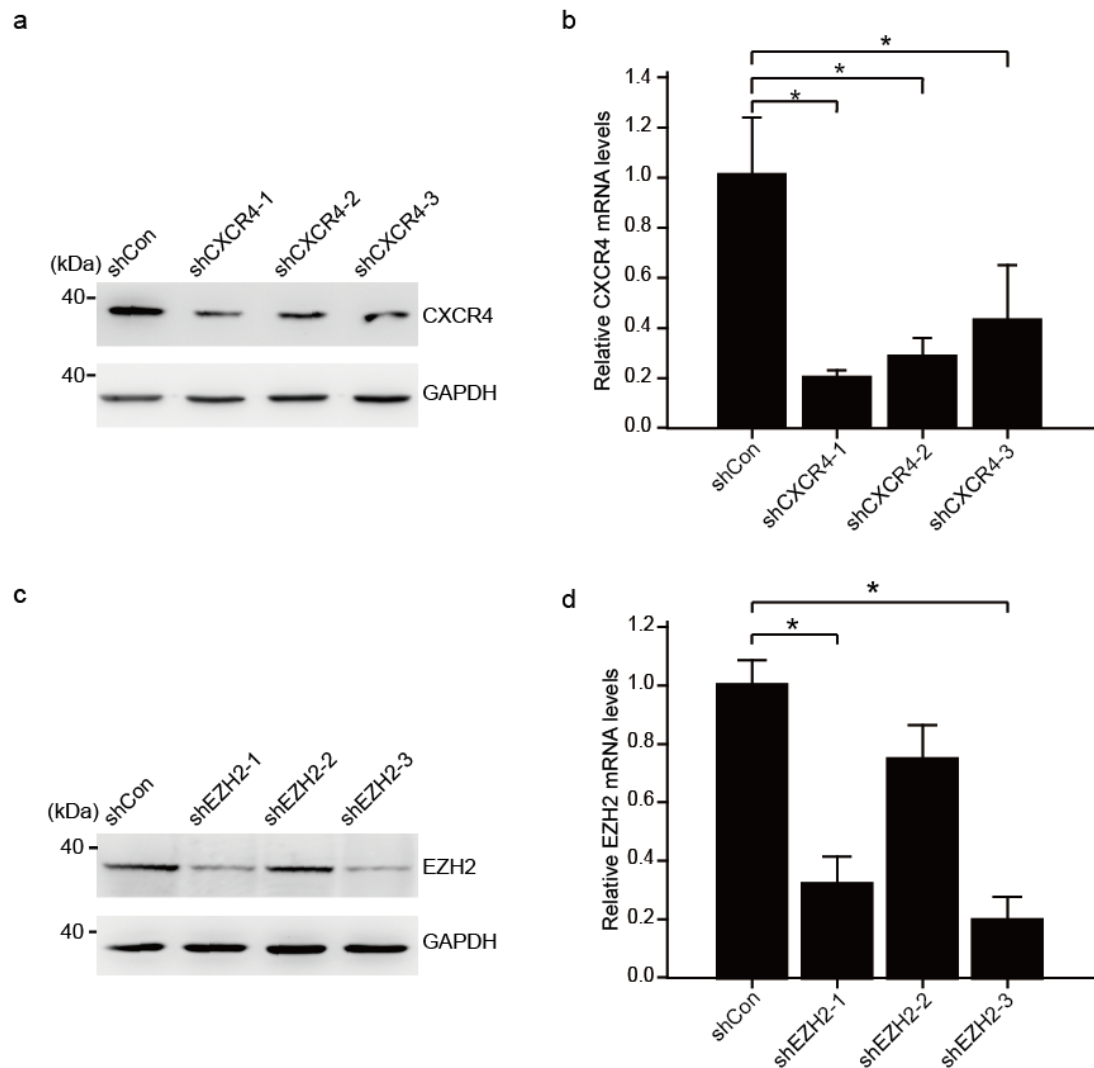

**Supplementary Figure 2: shRNA-mediated knockdown of CXCR4 and EZH2 expression in SK-Hep1 cells** (a) Western blot analysis of CXCR4 shRNA interference in SK-Hep1 cells. Data are representative immunoblots of three independent assays. (b) Real-time analysis of relative CXCR4 mRNA levels in above mentioned SK-Hep1 cells. ( $n=3$  per group). Student's  $t$ -test \*  $P < 0.05$ . Error bars in panels are defined as s.d. (c) Western blot analysis of EZH2 shRNA interference in SK-Hep1 cells. Data are representative immunoblots of three independent assays. (d) Real-time analysis of relative EZH2 mRNA levels in above mentioned SK-Hep1 cells. ( $n=3$  per group). Student's  $t$ -test \*  $P < 0.05$ . Error bars in panels are defined as s.d.



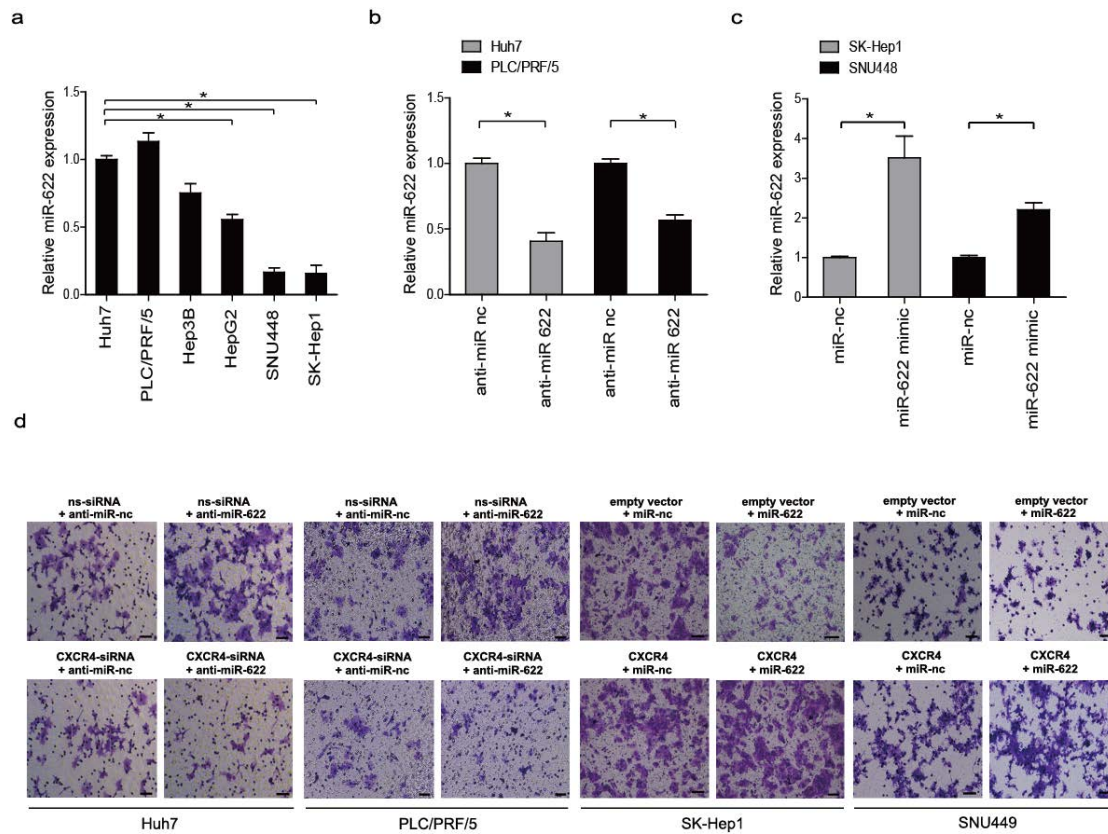

**Supplementary Figure 4:** related to Figure 5. CXCR4 mediate the effects of miR-622 on hepatoma cell growth and migration. (a) Real-time analysis of relative miR-622 levels in hepatoma cell lines ( $n=3$  per group). Student's  $t$ -test \*  $P < 0.05$ . Error bars in panels are defined as s.d. (b) Real-time analysis of relative miR-622 levels in Huh7 and PLC/PRF/5 cells transfected with anti-miR-nc or anti-miR-622 ( $n=3$  per group). Student's  $t$ -test \*  $P < 0.05$ . Error bars in panels are defined as s.d. (c) Real-time analysis of relative miR-622 levels in SK-Hep1 and SNU448 cells transfected with miR-nc or miR-622 mimic ( $n=3$  per group). Student's  $t$ -test \*  $P < 0.05$ . Error bars in panels are defined as s.d. (d) Representative images depicting cell migration assay performed with  $1 \times 10^6$  above mentioned hepatoma cells. Scale bar,  $50\mu\text{m}$ .

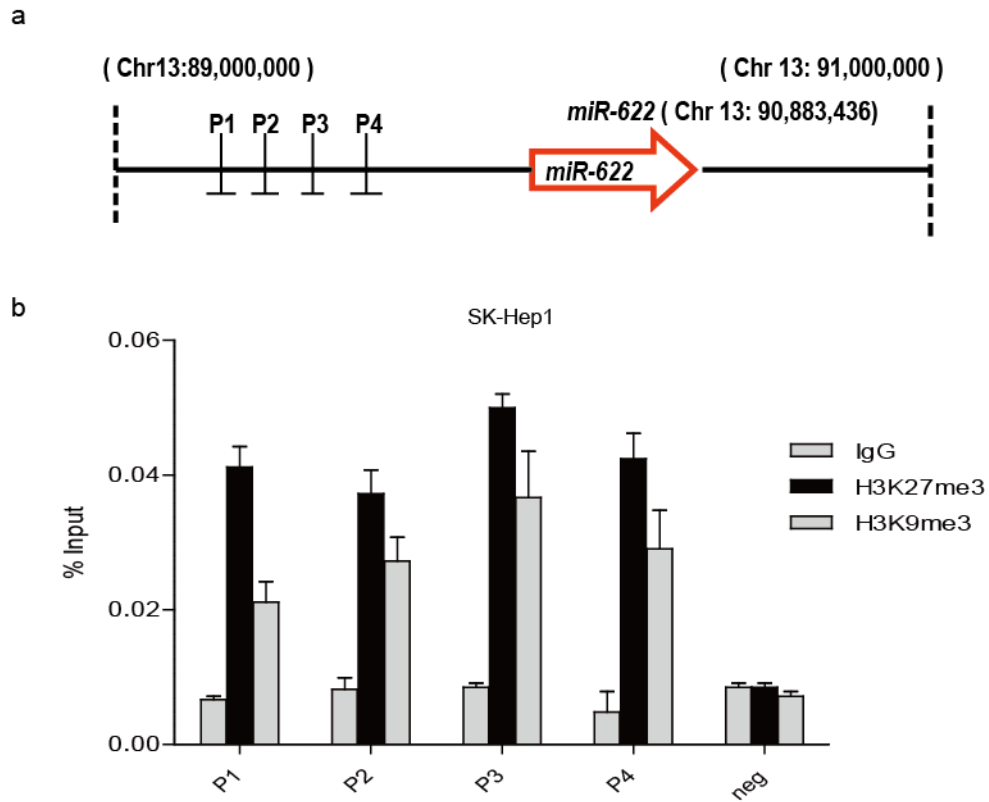

**Supplementary Figure 5: Genomic location and H3K27me3, H3K9me3 binding at upstream of miR-622** **(a)** Schematic showing genomic location of miR-622. The upstream regions used for CHIP-PCR are indicated as short black lines. **(b)** CHIP-PCR showing percent (%) input of H3K27me3 at indicated locations upstream of miR-622 in SK-Hep1 cells. IgG was used as control. ( $n = 3$  per group). Error bars in panels are defined as s.d.

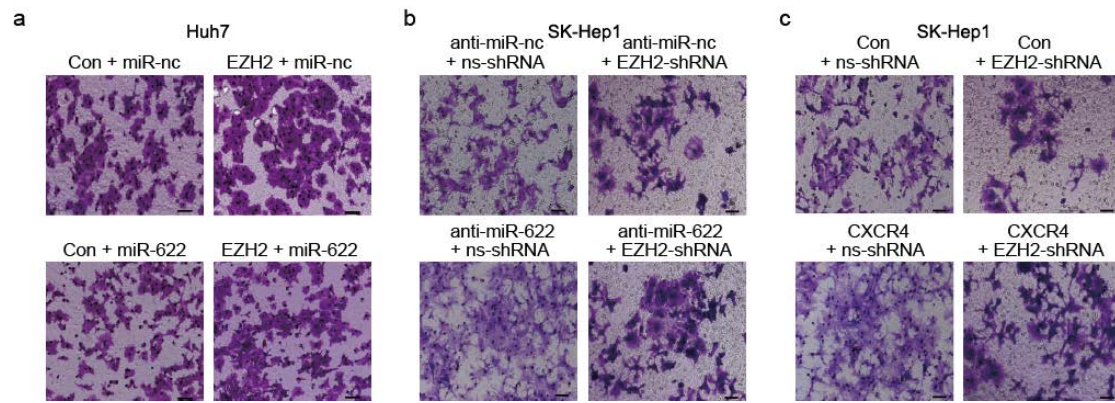

**Supplementary Figure 6:** related to Figure 8. EZH2 regulates CXCR4 by controlling miR-622 expression. (a) Representative images depicting cell migration assay performed with  $1 \times 10^6$  Huh7 cells cotransfected with or without miR-622 and CXCR4. (b, c) Representative images depicting cell migration assay performed with  $1 \times 10^6$  SK-Hep1 Cells cotransfected with or without EZH2-shRNA and anti-miR-622 or CXCR4. Scale bar, 50 $\mu$ m.

Fig.1c

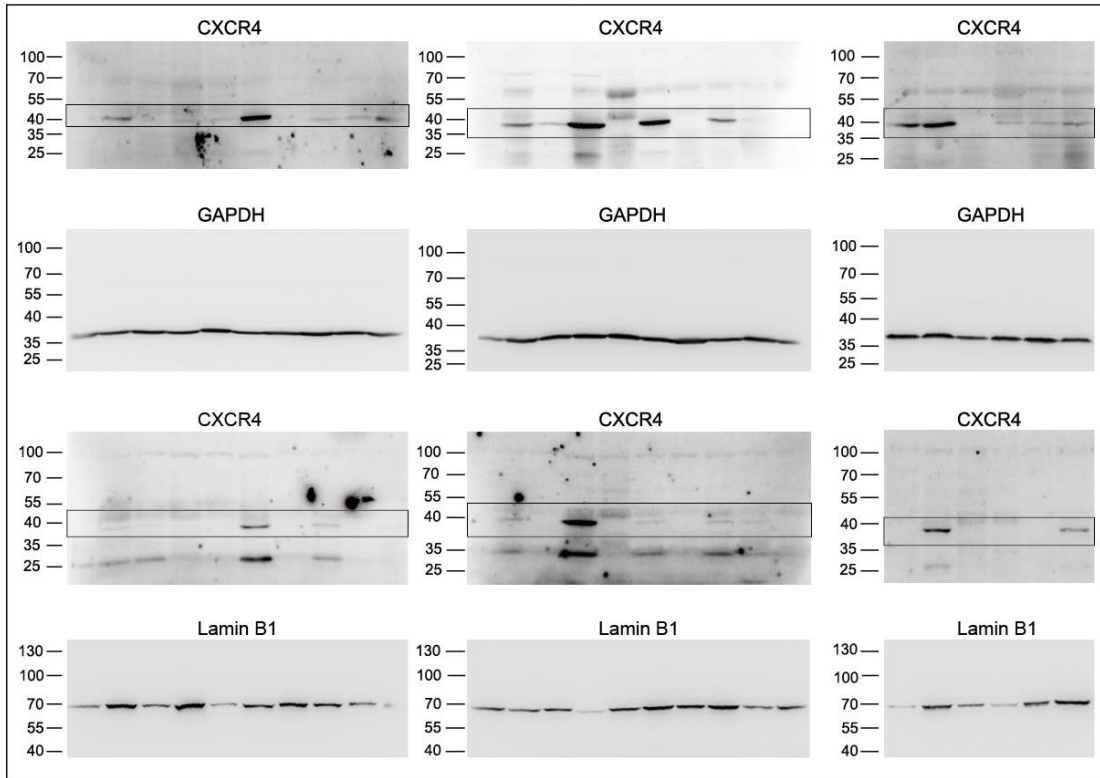

Fig. 2a

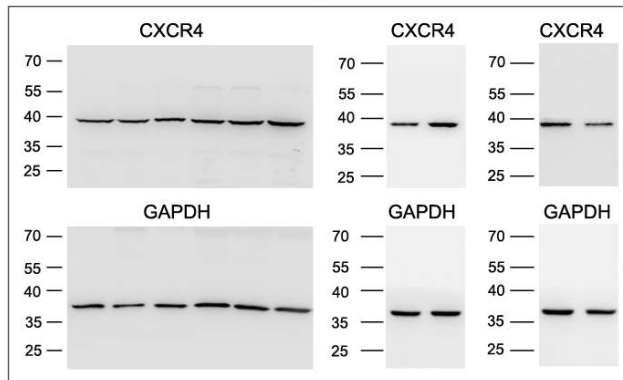

Fig. 4f-4g

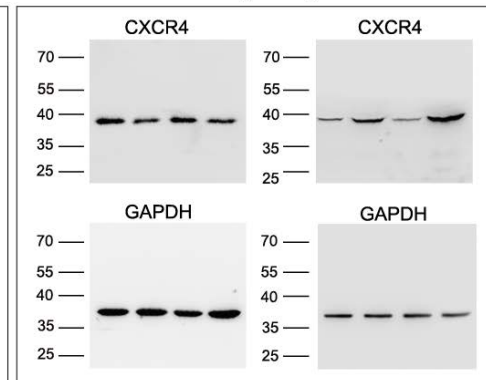

Supplementary Figure 7: Uncropped images of immunoblots.

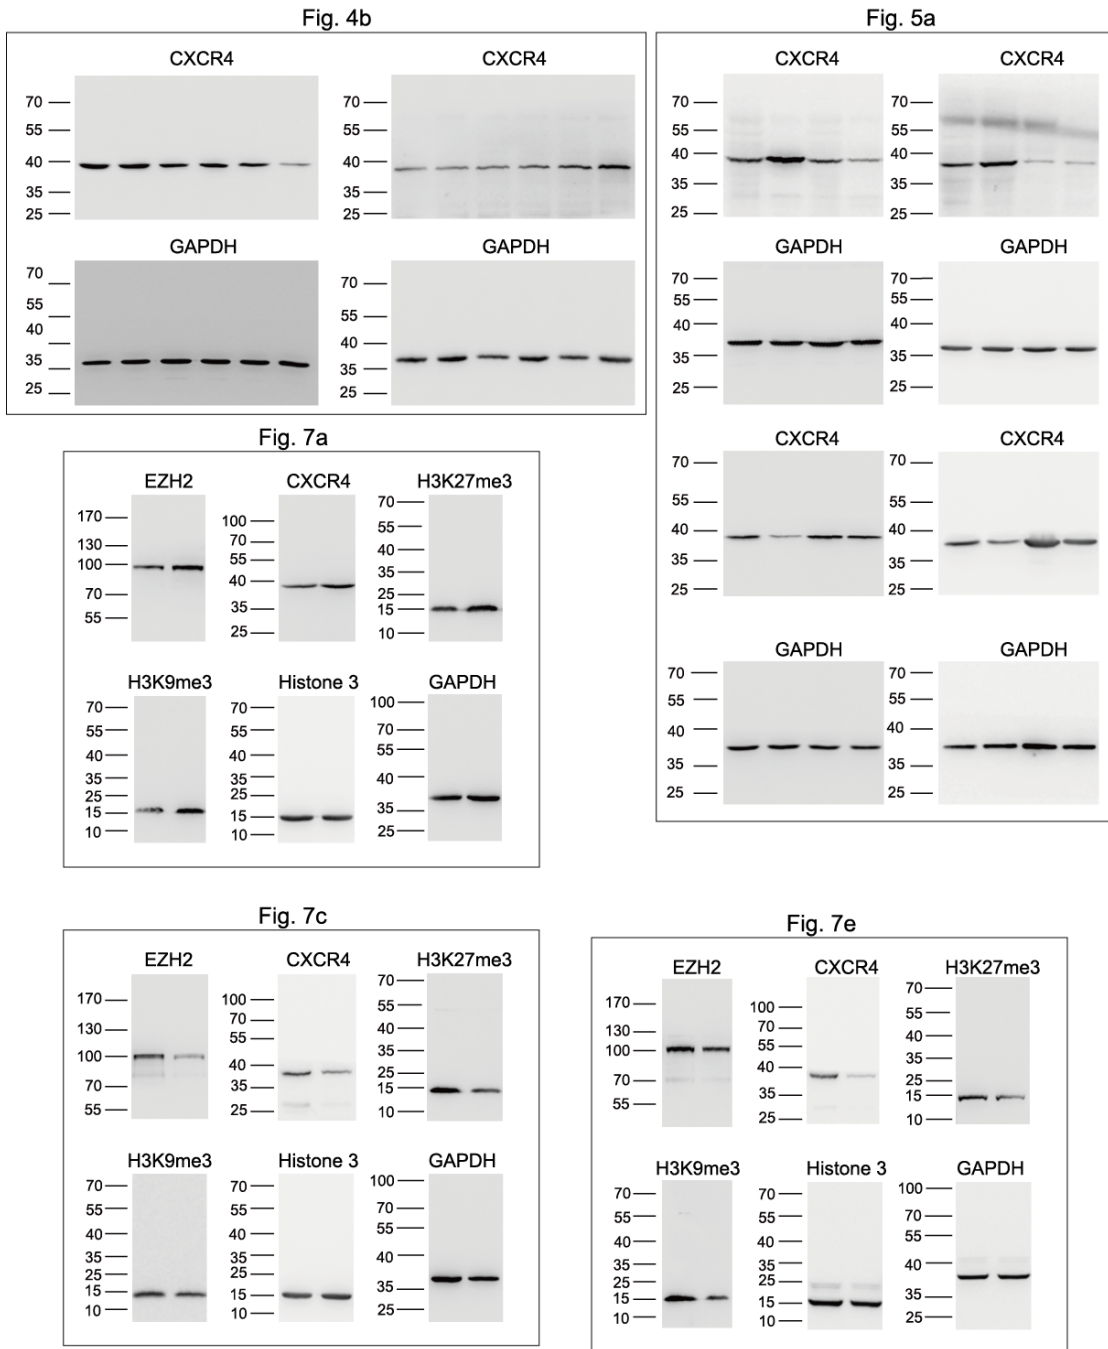

**Supplementary Figure 7: Uncropped images of immunoblots (continued).**



Fig. 8d

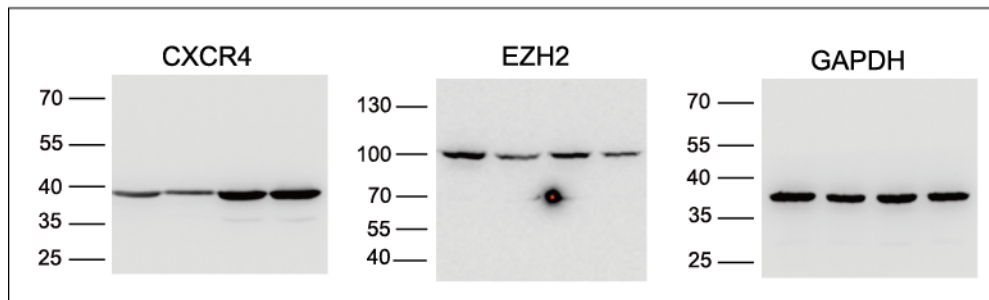

Supplementary Fig. 2a

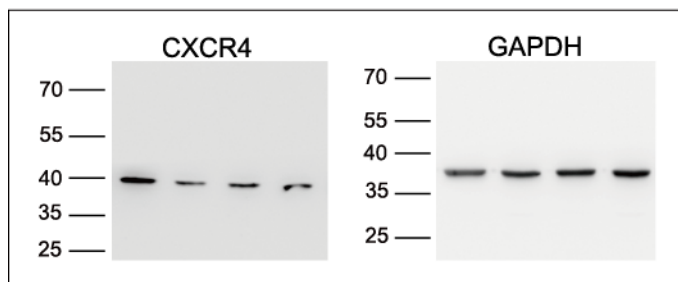

Supplementary Fig. 2c

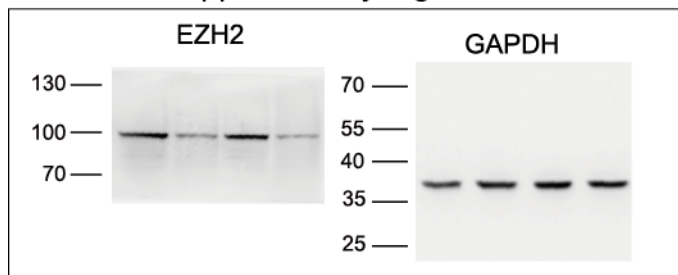

**Supplementary Figure 7:** Uncropped images of immunoblots (continued).

**Supplementary Table 1: Correlation between CXCR4 expression and clinicopathological characteristics of 127 HCCs**

| Characteristic        | Patients(n=127) |      | CXCR4 expression |            | P value           |
|-----------------------|-----------------|------|------------------|------------|-------------------|
|                       | Number          | %    | High (n=63)      | Low (n=64) |                   |
| Age (years)†          | 127             | 100  | 50.4±11.6        | 51.3±11.4  | 0.677             |
| Gender                |                 |      |                  |            | 0.424             |
| Male                  | 109             | 85.8 | 52               | 57         |                   |
| Female                | 18              | 14.2 | 11               | 7          |                   |
| Liver cirrhosis       |                 |      |                  |            | 0.801             |
| Absent                | 113             | 89.0 | 57               | 56         |                   |
| Present               | 14              | 11.0 | 6                | 8          |                   |
| Child-Pugh            |                 |      |                  |            | 0.203             |
| A                     | 121             | 95.3 | 58               | 63         |                   |
| B                     | 6               | 4.7  | 5                | 1          |                   |
| HBsAg                 |                 |      |                  |            | 0.106             |
| Negative              | 15              | 11.8 | 4                | 11         |                   |
| Positive              | 112             | 88.2 | 59               | 53         |                   |
| ALT(U/I)              |                 |      |                  |            | 0.538             |
| ≤ 40                  | 58              | 45.7 | 31               | 27         |                   |
| > 40                  | 69              | 54.3 | 32               | 37         |                   |
| AFP (ng/ml)           |                 |      |                  |            | 0.273             |
| ≤ 20                  | 39              | 30.7 | 16               | 23         |                   |
| > 20                  | 88              | 69.3 | 47               | 41         |                   |
| Tumor size            |                 |      |                  |            | <b>0.003</b>      |
| ≤ 5                   | 76              | 59.8 | 29               | 47         |                   |
| > 5                   | 51              | 40.2 | 34               | 17         |                   |
| Tumor number          |                 |      |                  |            | 0.854             |
| Single                | 103             | 81.1 | 51               | 52         |                   |
| Multiple              | 24              | 18.9 | 12               | 12         |                   |
| Tumor encapsulation   |                 |      |                  |            | 0.250             |
| Complete              | 66              | 52.0 | 29               | 37         |                   |
| None                  | 61              | 48.0 | 34               | 27         |                   |
| Tumor differentiation |                 |      |                  |            | 0.953             |
| I-II                  | 88              | 69.3 | 43               | 45         |                   |
| III-IV                | 39              | 30.7 | 20               | 19         |                   |
| Venous invasion       |                 |      |                  |            | <b>0.006</b>      |
| Absent                | 63              | 49.6 | 23               | 40         |                   |
| Present               | 64              | 50.4 | 40               | 24         |                   |
| BCLC stage            |                 |      |                  |            | <b>0.003</b>      |
| 0+A                   | 70              | 55.1 | 26               | 44         |                   |
| B+C                   | 57              | 44.9 | 37               | 20         |                   |
| TNM stage             |                 |      |                  |            | <b>&lt; 0.001</b> |
| I+II                  | 74              | 58.3 | 27               | 47         |                   |
| III                   | 53              | 41.7 | 36               | 17         |                   |

**Note:** Bold values indicate  $P < 0.05$ ,  $P$  values from student's  $t$ -test for age, Fisher's exact test for dichotomous variables, or chi-square when taking all categories into account. HBsAg, hepatitis B surface antigen, ALT, alanine aminotransferase, AFP, alpha-fetoprotein, BCLC, the Barcelona Clinic Liver Cancer staging

**Supplementary Table 2: Univariate cox regression analyses of overall survival and recurrence free survival after surgery in 127 HCCs**

| Characteristics                        | OS                  |                   | RFS                 |                   |
|----------------------------------------|---------------------|-------------------|---------------------|-------------------|
|                                        | HR (95% CI)         | P                 | HR (95% CI)         | P                 |
| Age                                    | 0.996 (0.975-1.018) | 0.744             | 1.000 (0.979-1.022) | 0.973             |
| Gender (male vs female)                | 2.108 (0.961-5.037) | 0.061             | 2.112 (0.972-4.186) | 0.056             |
| Liver cirrhosis (present vs absent)    | 1.231 (0.532-2.846) | 0.629             | 0.920 (0.441-1.920) | 0.826             |
| Child-Pugh (B vs A)                    | 2.587 (1.115-6.002) | <b>0.028</b>      | 1.245 (0.455-3.408) | 0.672             |
| HBsAg (positive vs negative)           | 1.386 (0.599-3.206) | 0.448             | 0.682 (0.358-1.298) | 0.246             |
| ALT, U/I (> 40 vs ≤ 40)                | 1.336 (0.804-2.220) | 0.266             | 1.099 (0.682-1.773) | 0.699             |
| AFP, ng/ml (> 20 vs ≤ 20)              | 2.101 (1.119-3.942) | <b>0.022</b>      | 1.112 (0.665-1.860) | 0.686             |
| Tumor encapsulation (none vs complete) | 1.844 (1.112-3.060) | <b>0.018</b>      | 1.806 (1.116-2.923) | <b>0.017</b>      |
| Tumor differentiation (III-IV vs I-II) | 1.673 (0.997-2.805) | 0.053             | 1.456 (0.878-2.414) | 0.148             |
| Tumor size, cm (>5 vs ≤5)              | 3.192 (1.870-5.449) | <b>&lt; 0.001</b> | 2.096 (1.279-3.402) | <b>0.003</b>      |
| Tumor number (multiple vs single)      | 1.098 (0.597-2.021) | 0.764             | 0.962 (0.516-1.791) | 0.903             |
| Vascular invasion (present vs absent)  | 2.743 (1.616-4.655) | <b>&lt; 0.001</b> | 2.114 (1.299-3.442) | <b>0.003</b>      |
| BCLC (B+C vs 0+A)                      | 4.265 (2.474-7.350) | <b>&lt; 0.001</b> | 2.475 (1.520-4.031) | <b>&lt; 0.001</b> |
| TNM (III vs I+II)                      | 4.062 (2.390-6.904) | <b>&lt; 0.001</b> | 1.879 (1.162-3.039) | <b>0.011</b>      |
| CXCR4 (high vs low)                    | 3.605 (2.072-6.272) | <b>&lt; 0.001</b> | 2.194 (1.345-3.580) | <b>0.002</b>      |

**Note:** Bold values indicate  $P < 0.05$ .  $P$  values from cox regression analysis. CI, confidence interval; HR, hazard ratio.

**Supplementary Table 3: miRNAs expression in HCC and peritumoral tissues**

| miRNA       | mature sequence             | tumor    | peritumor | fold change (t/p) |
|-------------|-----------------------------|----------|-----------|-------------------|
| miR-494     | UGAAACAUACACGGGAAACCUC      | 661.5784 | 525.5734  | 1.04              |
| miR-185     | UGGAGAGAAAGGCAGUCCUGA       | 242.3044 | 178.8209  | 1.06              |
| miR-204     | UUCCCUUUGUCAUCCUAUGCCU      | 79.3291  | 66.78498  | 1.04              |
| miR-224     | CAAGUCACUAGUGGUUCCGUU       | 180.3124 | 105.5249  | 1.11              |
| miR-381     | UAUACAAGGGCAAGCUCUCUGU      | 9.389448 | 50.83247  | -1.75             |
| miR-186     | CAAAGAAUUCUCCUUUUGGGCU      | 65.57133 | 74.00137  | -1.03             |
| miR-302d    | UAAGUGCUUCCAUGUUUGAGUGU     | 5.362223 | 8.033267  | -1.24             |
| miR-545     | UCAGCAAACAUUUUUGUGUGC       | 2.878668 | 4.283403  | -1.38             |
| miR-373     | GAAGUGCUUCGAUUUUGGGGUGU     | 2.338321 | 4.475798  | -1.94             |
| miR-520b    | AAAGUGCUUCCUUUAGAGGG        | 2.321819 | 5.450765  | -1.96             |
| miR-548e    | AAAAACUGAGACUACUUUUGCA      | 3.797283 | 4.367013  | -1.10             |
| miR-1183    | CACUGUAGGUGAUGGUGAGAGUGGGCA | 2.777272 | 6.604022  | -1.85             |
| miR-603     | CACACACUGCAAUUACUUUUGC      | 3.64929  | 6.436064  | -1.44             |
| miR-483-3p  | UCACUCCUCUCCUCCCGUCUU       | 14.65592 | 32.72705  | -1.30             |
| Let-7g      | UGAGGUAGUAGUUUGUACAGUU      | 4.312671 | 4.390575  | -1.01             |
| miR-520a-3p | AAAGUGCUUCCUUUUGGACUGU      | 5.816546 | 4.543678  | 1.16              |
| miR-491-3p  | CUUAUGCAAGAUUCCCUUCUAC      | 2.59356  | 3.263806  | -1.24             |
| miR-487b    | AAUCGUACAGGGUCAUCCACUU      | 28.31648 | 33.02172  | -1.05             |
| miR-588     | UUGGCCACAAUGGGUUAGAAC       | 7.131973 | 4.333252  | 1.34              |
| miR-586     | UAUGCAUUGUAUUUUUAGGUCC      | 3.510287 | 4.376949  | -1.18             |
| miR-519c-3p | AAAGUGCAUCUUUUUAGAGGAU      | 4.860589 | 4.433626  | 1.06              |
| miR-548b-3p | CAAGAACCUCAGUUGCUUUUGU      | 3.38019  | 3.450607  | -1.02             |
| miR-329     | AACACACCUGGUUAACCUCUUU      | 2.314246 | 3.50946   | -1.50             |
| miR-570     | CGAAAACAGCAAUUACCUUUGC      | 3.485425 | 5.43387   | -1.36             |
| miR-520c-3p | AAAGUGCUUCCUUUAGAGGGU       | 4.923935 | 8.816524  | -1.37             |
| miR-300     | AAAGUGCUUCCUUUAGAGGGU       | 3.305262 | 5.835495  | -1.48             |
| miR-302b    | UAAGUGCUUCCAUGUUUAGUAG      | 3.460078 | 6.438606  | -1.50             |
| miR-634     | AACCAGCACCCCAACUUUGGAC      | 4.769967 | 4.19367   | 1.09              |
| miR-613     | AGGAAUGUCCUUCUUUGCC         | 2.189799 | 2.449947  | -1.14             |
| miR-873     | GCAGGAACUUGUGAGUCUCCU       | 2.7184   | 1.852728  | 1.62              |
| miR-410     | AAUAUAACACAGAUGGCCUGU       | 6.378645 | 3.653405  | 1.43              |
| miR-495     | AAACAAACAUGGUGCACUUCUU      | 6.089215 | 10.70869  | -1.31             |
| miR-520d-3p | AAAGUGCUUCUCUUUGGUGGGU      | 3.291087 | 1.75918   | 2.11              |
| miR-338-3p  | UCCAGCAUCAGUGAUUUUGUUG      | 3.803744 | 3.225022  | 1.14              |
| miR-548c-3p | CAAAAUCUCAUUUACUUUUGC       | 1.244822 | 1.3679    | -1.43             |
| miR-302e    | AAAGCUGGGUUGAGAAGG          | 1.6257   | 2.467117  | -1.86             |
| miR-548g    | AAAACUGAAUUACUUUUGUAC       | 2.461921 | 2.447566  | 1.01              |
| miR-1299    | UUCUGGAAUUCUGUGAGGGGA       | 1.414882 | 1.458405  | -1.09             |
| miR-655     | AUAAUACAUGGUUAACCUCUUU      | 3.488609 | 5.526509  | -1.37             |
| miR-623     | AUCCCUUGCAGGGGCUGUUGGGU     | 1.767646 | 1.54252   | 1.31              |

|             |                         |          |          |       |
|-------------|-------------------------|----------|----------|-------|
| miR-548p    | UAGCAAAAACUGCAGUUACUUU  | 2.630977 | 3.688518 | -1.35 |
| miR-548f    | UGCAAAAGUAAUCACAGUUUUU  | 1.794852 | 2.275522 | -1.41 |
| miR-548d-3p | CAAAAACACAGUUUCUUUUGC   | 2.441227 | 2.441227 | -1.00 |
| miR-519a    | AAAGUGCAUCCUUUUAGAGUGU  | 3.048649 | 1.579421 | 2.44  |
| miR-153     | UUGCAUAGUCACAAAAGUGAUC  | 2.718713 | 3.341707 | -1.21 |
| miR-1297-3p | UUCAAGUAAUUCAGGUG       | 2.933135 | 2.521644 | 1.16  |
| miR-338-5p  | UCCAGCAUCAGUGAUUUUGUUG  | 1.483307 | 1.65247  | -1.27 |
| miR-659     | CUUGGUUCAGGGAGGGUCCCA   | 3.79243  | 2.478187 | 1.47  |
| miR-448     | UUGCAUAUGUAGGAUGUCCAU   | 2.526329 | 2.270782 | 1.13  |
| miR-302a    | UAAGUGCUUCCAUGUUUGGUGA  | 3.024506 | 2.076679 | 1.51  |
| miR-211     | UUCCCUUUGUCAUCCUUGCCU   | 7.093168 | 5.011703 | 1.22  |
| miR-1284    | UCUAUACAGACCCUGGCUUUUC  | 5.435213 | 2.521771 | 1.83  |
| miR-548a-3p | CAAAACUGGCAAUUACUUUUGC  | 2.537592 | 2.56968  | -1.01 |
| miR-520e    | AAAGUGCUUCCUUUUUGAGGG   | 2.784481 | 2.924389 | -1.05 |
| miR-519b-3p | AAAGUGCAUCCUUUUAGAGGUU  | 4.470954 | 6.817912 | -1.28 |
| miR-513b    | UUCACAAGGAGGUGUCAUUUAU  | 3.35167  | 3.032499 | 1.09  |
| miR-582-5p  | UUACAGUUGUUAACCAGUUACU  | 3.089191 | 9.875985 | -1.96 |
| miR-372     | AAAGUGCUGCGACAUUUGAGCGU | 2.164811 | 4.425403 | -1.93 |
| miR-1       | UGGAAUGUAAAAGAAGUAUGUAU | 1.835526 | 3.202492 | -1.92 |
| miR-302c    | UAAGUGCUUCCAUGUUUCAGUGG | 1.788039 | 3.54087  | -2.18 |
| miR-139-5p  | UCUACAGUGCACGUGUCUCCAG  | 21.06479 | 1001.924 | -2.27 |
| miR-9       | UCUUUGGUUAUCUAGCUGUAUGA | 3.680397 | 49.03445 | -2.99 |
| miR-206     | UGGAAUGUAAGGAAGUGUGUGG  | 1.752483 | 6.491815 | -3.33 |
| miR-622     | ACAGUCUGCUGAGGUUGGAGC   | 1.241534 | 4.810622 | -7.26 |

**Supplementary Table 4: Target sequences of shRNA**

| <b>shRNA target</b> | <b>Target sequence</b>          |           |
|---------------------|---------------------------------|-----------|
| Luc                 | GGATTTTCAGTCGATGTACACGTTTCGTCAC |           |
| CXCR4-1             | TTCTTCGCCTGTTGGCTGCCTTACTACAT   | TR313630A |
| CXCR4-2             | AGTCAACCTCTACAGCAGTGTCCATCC     | TR313630B |
| CXCR4-3             | CCATCCTCTATGCTTTCCTTGGAGCCAAA   | TR313630C |
| EZH2-1              | CAAGAGGTTTCAGACGAGCTGATGAAGTAA  | TR304713A |
| EZH2-2              | GACGATGATGATGATGGAGACGATCCTGA   | TR304713B |
| EZH2-3              | ATTGAACCTCCTGAGAATGTGGAGTGGAG   | TR304713C |

**Supplementary Table 5: Primers used for gene cloning and qRT-PCR**

| Name               |         | Sequence                             |
|--------------------|---------|--------------------------------------|
| CXCR4 3'UTR        | Forward | 5'-GCTCTAGACTGTTTCCACTGAGTCTGAG-3'   |
|                    | Reverse | 5'-GCGGCCGCCCACACTGTAGGTGCTGAAATC-3' |
| CXCR4<br>3'UTR-Mut | Forward | 5'-CATTTTTCAGATATAAATCTGACAC-3'      |
|                    | Reverse | 5'-CAATATTGGTGTGAGATTTATATC-3'       |
| CXCR4              | Forward | 5'-GGTGGTCTATGTTGGCGTCT-3'           |
|                    | Reverse | 5'-GTCATTGGGGTAGAAGCGGT-3'           |
| GAPDH              | Forward | 5'-CTGCACCACCAACTGCTTAG-3'           |
|                    | Reverse | 5'-GCCATCCACAGTCTTCTGGG-3'           |
| miR-494            | Forward | 5'-TGAAACATACACGGGAAACCTC-3'         |
| miR-185            | Forward | 5'-TGGAGAGAAAGGCAGTTCCTGA-3'         |
| miR-204            | Forward | 5'-TTCCCTTTGTCATCCTATGCCT-3'         |
| miR-224            | Forward | 5'-CAAGTCACTAGTGGTTCCGT-3'           |
| miR-381            | Forward | 5'-AGCGAGTTGCCCTTTGTATAT-3'          |
| miR-186            | Forward | 5'-CAAAGAATTCTCCTTTTGGGCT-3'         |
| miR-302d           | Forward | 5'- ACTTTAACATGGAGGCACTTGC -3'       |
| miR-545            | Forward | 5'- TCAGTAAATGTTTATTAGATGA-3'        |
| miR-373            | Forward | 5'- ACTCAAATGGGGGCGCTTTCC-3'         |
| miR-520b           | Forward | 5'- AAAGTGCTTCCCTTTTAGAGGG -3'       |
| miR-548e           | Forward | 5'- CAAAAGCAATCGCGGTTTTTGC -3'       |
| miR-1183           | Forward | 5'- CACTGTAGGTGATGGTGAGAGTGGGCA-3'   |
| miR-603            | Forward | 5'- CACACACTGCAATTAATTTTGC-3'        |
| miR-483-3p         | Forward | 5'- TCACTCCTCTCCTCCCGTCT-3'          |
| Let-7g             | Forward | 5'-TGAGGTAGTAGTTTGTACAGTT-3'         |
| miR-520a-3p        | Forward | 5'- AAAGTGCTTCCCTTTGGACTGT-3'        |
| miR-491-3p         | Forward | 5'- CTTATGCAAGATTCCTTCTAC-3'         |
| miR-487b           | Forward | 5'- GTGGTTATCCCTGTCTGTTTCG -3'       |
| miR-588            | Forward | 5'- TTGGCCACAATGGGTAGAAC-3'          |
| miR-586            | Forward | 5'- TATGCATTGTATTTTAGGTCC-3'         |
| miR-519c-3p        | Forward | 5'- AAAGTGCATCTTTTLAGAGGAT-3'        |
| miR-548b-3p        | Forward | 5'- CAAGAACCTCAGTTGCTTTTGT-3'        |
| miR-329            | Forward | 5'- GAGGTTTTCTGGGTTTCTGTTTC-3'       |
| miR-570            | Forward | 5'- AAAGGTAATTGCAGTTTTTCCC-3'        |
| miR-520c-3p        | Forward | 5'- AAAGTGCTTCCCTTTAGAGGGT-3'        |
| miR-300            | Forward | 5'- TATACAAGGGCAGACTCTCTCT-3'        |
| miR-302b           | Forward | 5'- ACTTTAACATGGAAGTGCTTTC-3'        |
| miR-634            | Forward | 5'- AACCAGCACCCCAACTTTGGAC-3'        |
| miR-613            | Forward | 5'- AGGAATGTTCTTCTTTGCC-3'           |
| miR-873            | Forward | 5'- GCAGGAACTTGTGAGTCTCCT-3'         |
| miR-410            | Forward | 5'- AGGTTGTCTGTGATGAGTTCG-3'         |

|                                                                                                                              |         |                                |
|------------------------------------------------------------------------------------------------------------------------------|---------|--------------------------------|
| miR-495                                                                                                                      | Forward | 5'- GAAGTTGCCCATGTTATTTTCG-3'  |
| miR-520d-3p                                                                                                                  | Forward | 5'- AAAGTGCTTCTCTTTGGTGGGT-3'  |
| miR-338-3p                                                                                                                   | Forward | 5'- TCCAGCATCAGTGATTTTGTTG-3'  |
| miR-548c-3p                                                                                                                  | Forward | 5'- CAAAAATCTCAATTACTTTTGC-3'  |
| miR-302c                                                                                                                     | Forward | 5'- TTTAACATGGGGGTACCTGCTG-3'  |
| miR-548g                                                                                                                     | Forward | 5'- TGCAAAAGTAATTGCAGTTTTTG-3' |
| miR-1299                                                                                                                     | Forward | 5'- TTCTGGAATTCTGTGTGAGGGA-3'  |
| miR-655                                                                                                                      | Forward | 5'- AGAGGTTATCCGTGTTATG TTC-3' |
| miR-623                                                                                                                      | Forward | 5'- ATCCCTTGCAGGGGCTGTTGGGT-3' |
| miR-548p                                                                                                                     | Forward | 5'- TAGCAAAAAGTGCAGTTACTTT-3'  |
| miR-548f                                                                                                                     | Forward | 5'- TGCAAAAGTAATCACAGTTTTT-3'  |
| miR-548d-3p                                                                                                                  | Forward | 5'- CAAAAACCACAGTTTCTTTTGC-3'  |
| miR-519a                                                                                                                     | Forward | 5'- CTCTAGAGGGAAGCGCTTTCTG-3'  |
| miR-153                                                                                                                      | Forward | 5'- TCATTTTTGTGATGTTGCAGCT-3'  |
| miR-1207-3p                                                                                                                  | Forward | 5'- TCAGCTGGCCCTCAT TTC-3'     |
| miR-338-5p                                                                                                                   | Forward | 5'- AACAATATCCTGGTGCTGAGTG-3'  |
| miR-659                                                                                                                      | Forward | 5'- AGGACCTTCCCTGAACCAAGGA-3'  |
| miR-448                                                                                                                      | Forward | 5'- TTGCATATGTAGGATGTCCCAT-3'  |
| miR-302a                                                                                                                     | Forward | 5'- ACTTAAACGTGGATGTACTTGCT-3' |
| miR-211                                                                                                                      | Forward | 5'- TTCCCTTTGTCATCCTTCGCCT-3'  |
| miR-1284                                                                                                                     | Forward | 5'- TCTATACAGACCCTGGCTTTTC-3'  |
| miR-548a-3p                                                                                                                  | Forward | 5'- CAAAAGTGGCAATTACTTTTGC-3'  |
| miR-520e                                                                                                                     | Forward | 5'- AAAGTGCTTCTTTTGGAGGG-3'    |
| miR-519b-3p                                                                                                                  | Forward | 5'- AAAGTGCATCCTTTTAGAGGTT-3'  |
| miR-513b                                                                                                                     | Forward | 5'- TTCACAAGGAGGTGTCATTTAT-3'  |
| miR-582-5p                                                                                                                   | Forward | 5'- TTACAGTTGTTCAACCAGTTACT-3' |
| miR-372                                                                                                                      | Forward | 5'- CCTCAAATGTGGAGCACTATTCT-3' |
| miR-9                                                                                                                        | Forward | 5' TCTTTGGTTATCTAGCTGTATGA--3' |
| miR-302c                                                                                                                     | Forward | 5'- TTTAACATGGGGGTACCTGCTG-3'  |
| miR-139-5p                                                                                                                   | Forward | 5'- TCTACAGTGCACGTGTCTCCAGT-3' |
| miR-1                                                                                                                        | Forward | 5'- TGGAATGTAAAGAAGTATGTAT-3'  |
| miR-206                                                                                                                      | Forward | 5'- TGGAATGTAAGGAAGTGTGTGG-3'  |
| miR-622                                                                                                                      | Forward | 5'- ACAGTCTGCTGAGGTTGGAGC-3'   |
| U6snRNA                                                                                                                      | Forward | 5'-CTCGCTTCGGCAGCACA-3'        |
|                                                                                                                              | Reverse | 5'-AACGCTTCACGAATTTGCGT-3'     |
| Forward primers for mature miRNAs were provided here, reverse primer was provided by Invitrogen as Universal qRT-PCR primer. |         |                                |



**Supplementary Table 6: All primary antibodies against the indicted proteins used in the present study are listed**

| Antibody  | Provider               | Host   | Dilution                  |
|-----------|------------------------|--------|---------------------------|
| CXCR4     | Millipore (AB1846)     | Rabbit | 1:1000 WB<br>1:200 IHC    |
| EZH2      | Millipore (07-689)     | Rabbit | 1 : 1000 WB<br>1:100 CHIP |
| EZH2      | Abcam (ab 3748)        | Rabbit | 1:400 IHC                 |
| H3k27me3  | Millipore (17-622)     | Rabbit | 1: 2000 WB<br>1:100 CHIP  |
| H3K9me3   | Millipore (05-745R)    | Rabbit | 1:2000 WB<br>1:100 CHIP   |
| Histone 3 | Millipore (06-755)     | Rabbit | 1:3000 WB                 |
| GAPDH     | Santa cruz (sc-365062) | Mouse  | 1:2000 WB                 |
| Lamin B1  | Santa cruz (sc-377001) | Mouse  | 1:4000 WB                 |
| Ki 67     | DAKO (MIB-1)           | Mouse  | 1:1000 IHC                |
